# Supplementary material for: A Role for RUNX3 in Inflammation-Induced Expression of IL23A in Gastric Epithelial Cells
Source: PubMed Central journal article supplement — Cell Rep. Author manuscript; Available in PMC 2015 Jul 10. (PMC4307917; doi:10.1016/j.celrep.2014.06.003), 2014-07-05
Supplement: NIHMS648725-supplement-Supp_Data_1.pdf [file NIHMS648725-supplement-Supp_Data_1.pdf]

Cell Reports, Volume 8

Supplemental Information

## **A Role for RUNX3 in Inflammation-Induced Expression of *IL23A* in Gastric Epithelial Cells**

Yit Teng Hor, Dominic Chih-Cheng Voon, Jason Kin Wai Koo, Huajing Wang, Wen Min Lau, Hassan Ashktorab, Shing Leng Chan, and Yoshiaki Ito

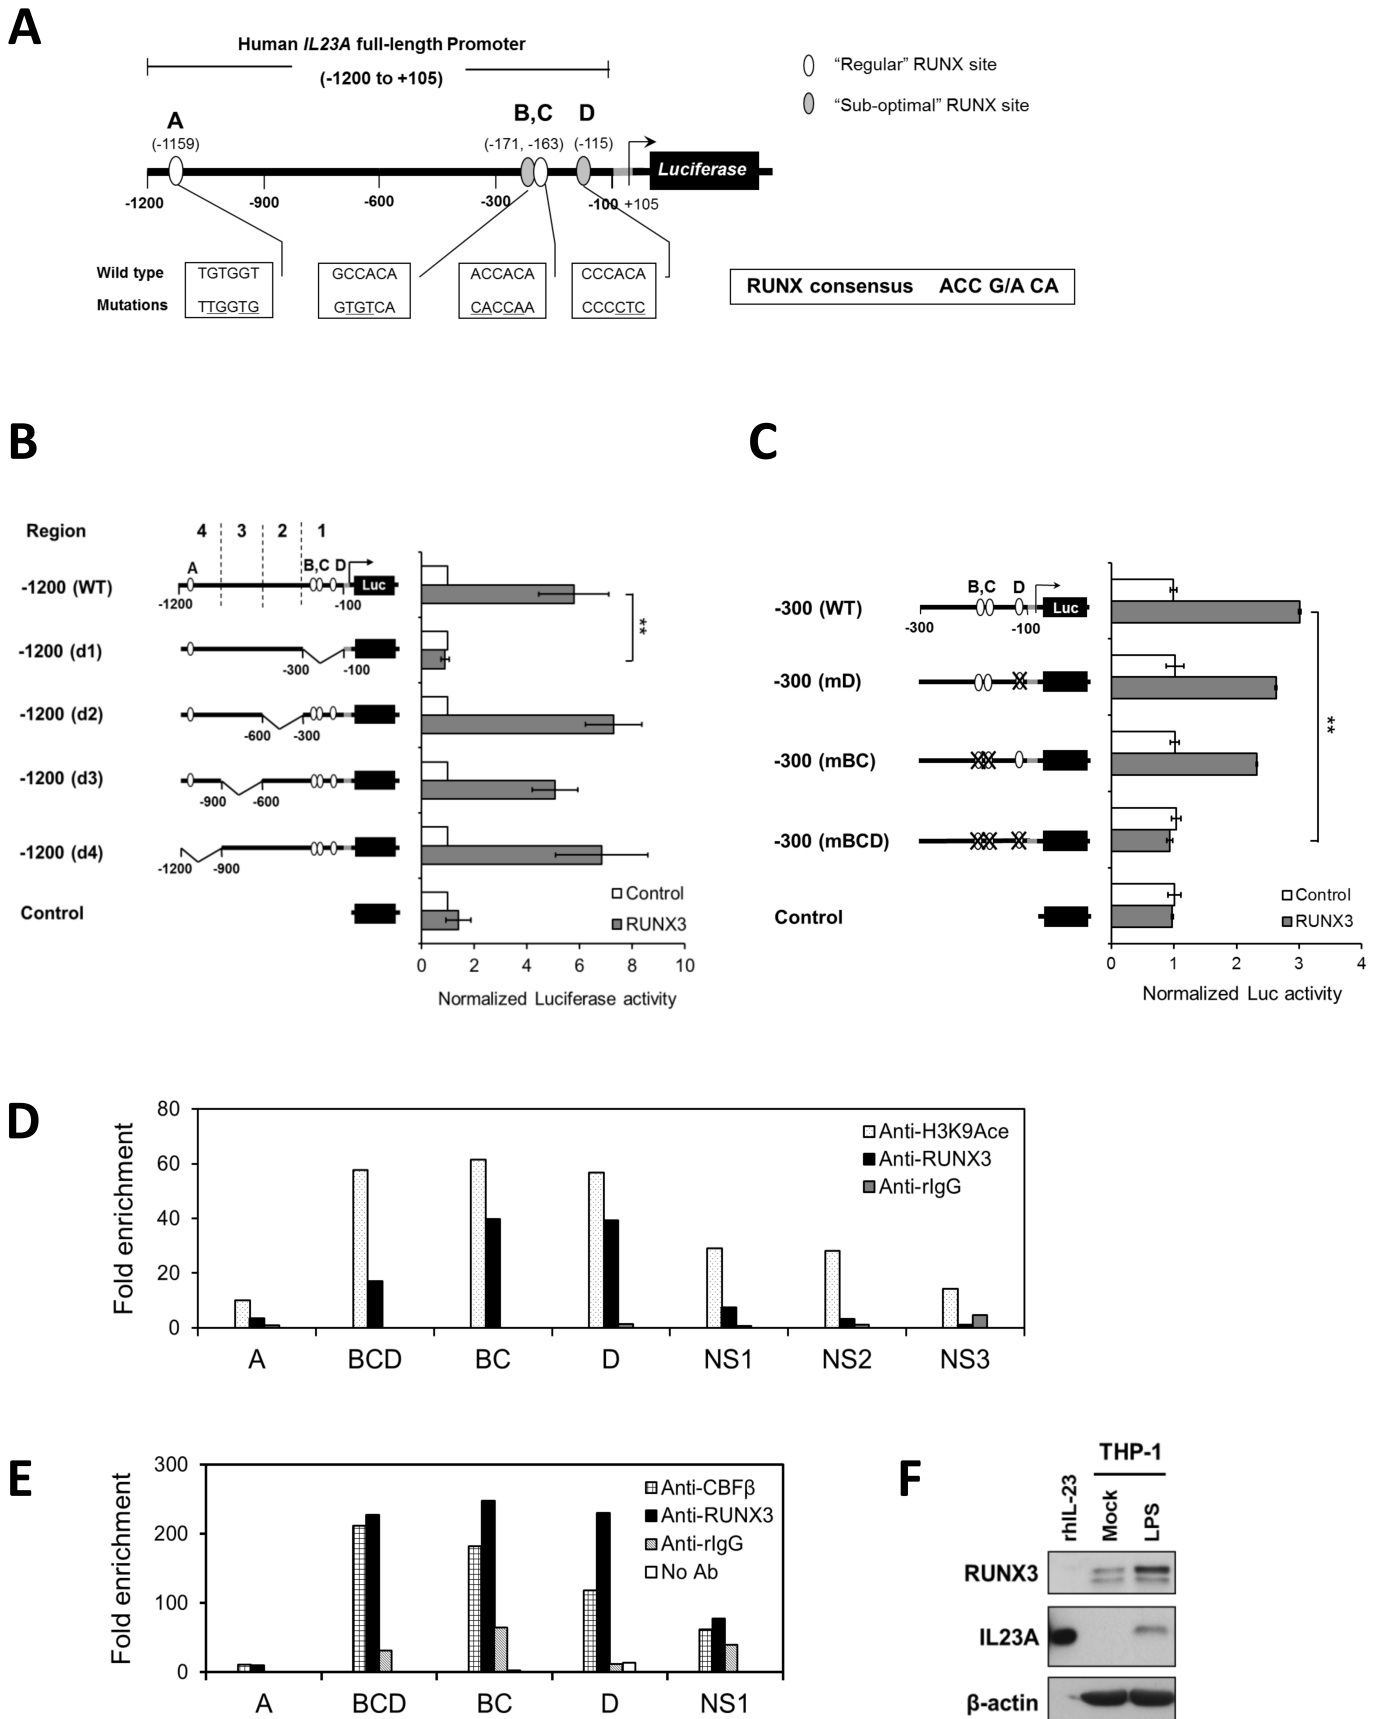

**Figure S1. Functional RUNX binding sites in *IL23A* promoter. (Related to Figure 1)**

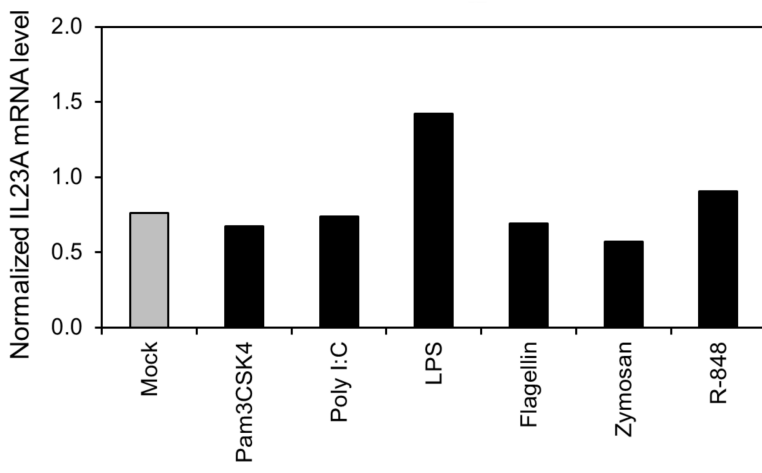

**Figure S2. TLR ligands have minor effects on IL23A expression in SNU16 cells. (Related to Figure 2)**

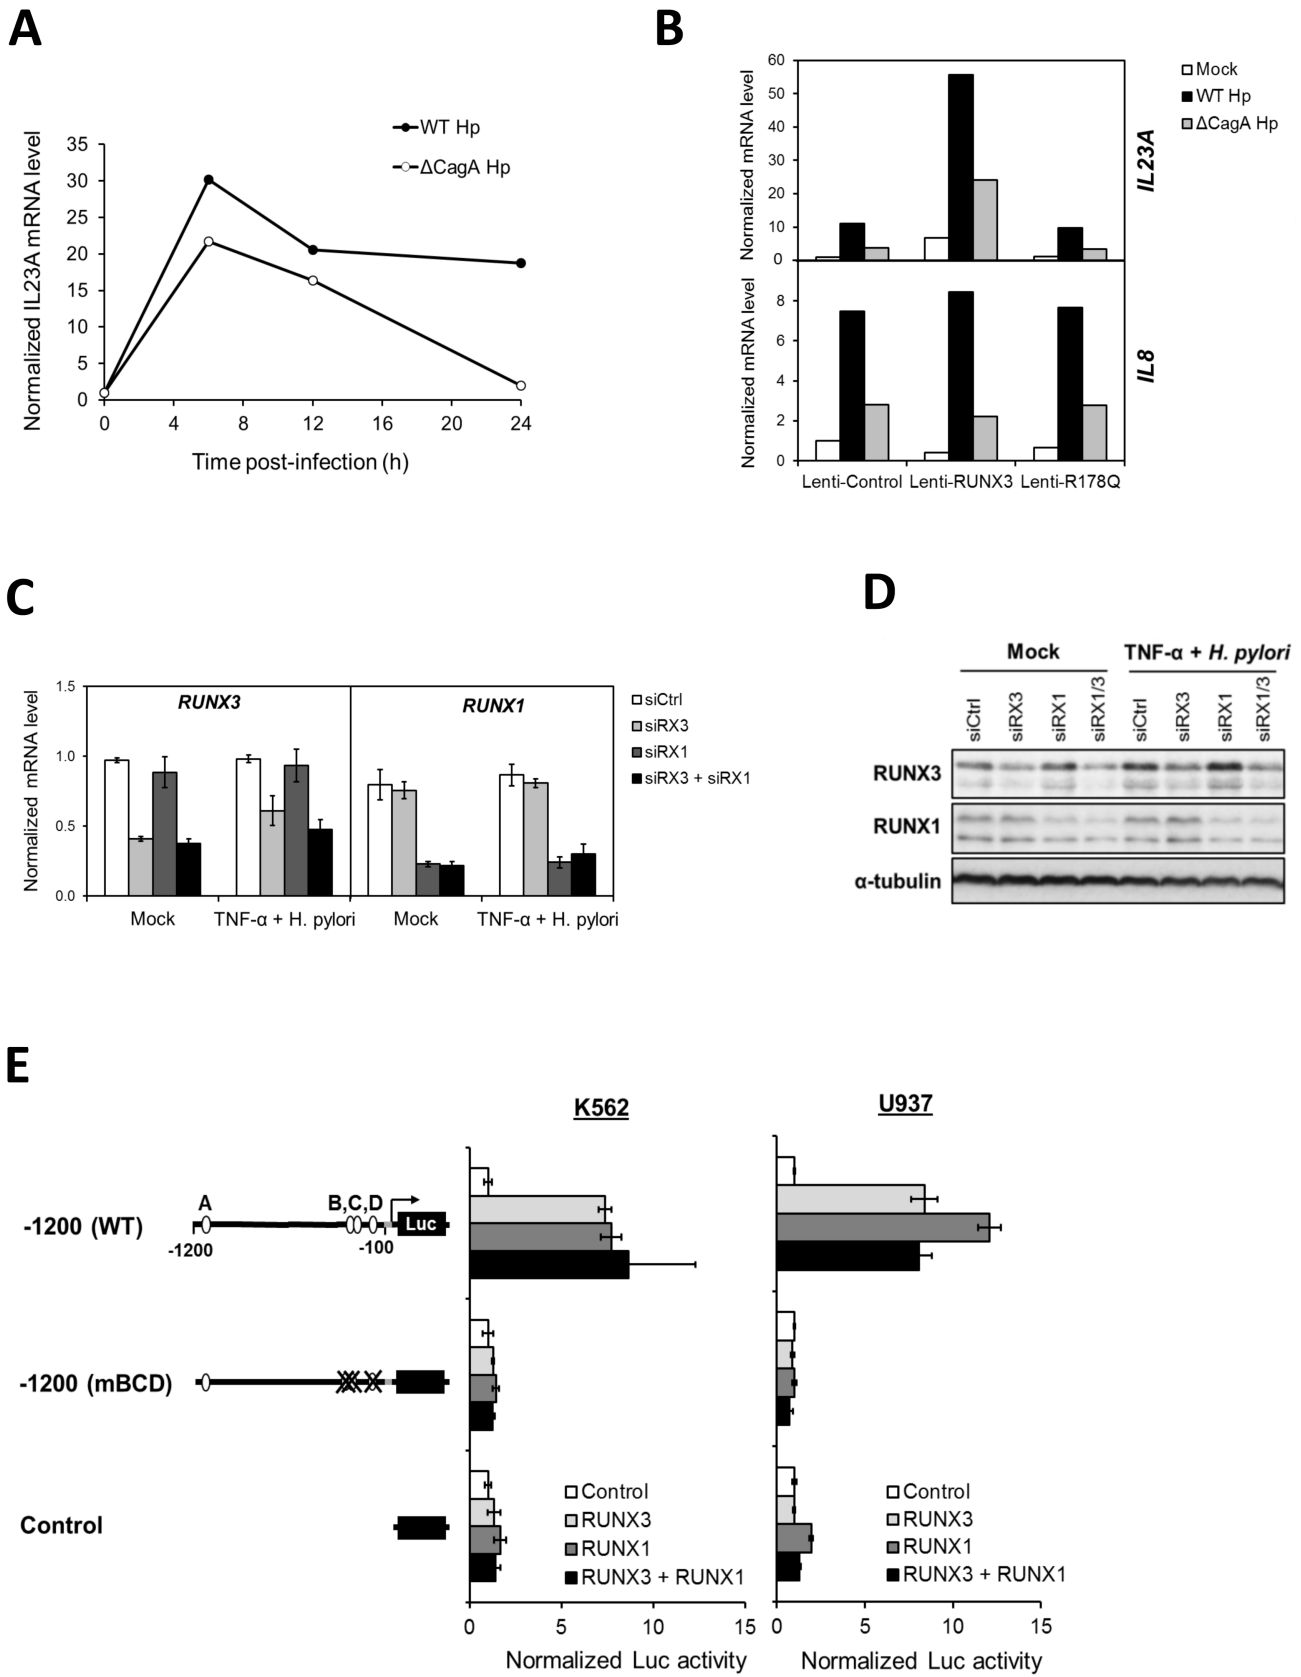

**Figure S3. Contribution of RUNX3 and RUNX1 in the regulation of IL23A. (Related to Figure 3)**

## SUPPLEMENTAL FIGURE LEGENDS

### **Figure S1. Functional RUNX binding sites in *IL23A* promoter. (Related to Figure 1)**

(A) Schematic diagram representing the upstream promoter region (-1200 to +105) of *IL23A* gene cloned into a firefly luciferase reporter construct. The four putative RUNX sites identified using Transcriptional Element Search System program were classified into regular RUNX sites (sites A and C) and sub-optimal RUNX sites (sites B and D) based on the RUNX consensus sequence. (B-C) RUNX3 transactivates *IL23A* via three RUNX sites in proximal region of the promoter. A series of (B) individual deletions and (C) single or compound mutations of the *IL23A*-1200 reporter constructs were transiently transfected into KATOIII cells together with either Control or RUNX3 expression vector as described for Fig. 1C. The normalized luciferase activities of each construct are expressed relative to those of their Control sample (means  $\pm$  SEM; n=3). (D-E) Specific binding of RUNX3 on *IL23A* is enriched in regions containing three functional RUNX binding sites. Chromatin of HFE-145 cells transduced with Lenti-RUNX3 (D) and LPS-induced THP-1 cells (E) were cross-linked and immunoprecipitated as described for Fig. 1D. Enrichment of chromatin fragments were quantitated using real-time PCR and expressed relative to rIgG control of region A. (F) Whole cell lysates from LPS-stimulated or non-stimulated THP-1 cells were analyzed by Western blotting for the protein expression of *IL23A*, RUNX3 and  $\beta$ -actin (loading control).

### **Figure S2. TLR ligands have minor effects on *IL23A* expression in SNU16 cells. (Related**

**to Figure 2)** RUNX1- and RUNX3-positive SNU16 cells were used for screening the effects

of TLR ligands on *IL23A* expression. Cells were treated with the corresponding TLR ligands for 6h as described for Fig. 2B. The normalized levels of *IL23A* were measured by qRT-PCR and expressed relative to Mock sample values.

**Figure S3. Contribution of RUNX3 and RUNX1 in the regulation of IL23A. (Related to**

**Figure 3)** (A) Time-dependent effects of WT and CagA-defective isogenic mutant ( $\Delta$ CagA)

strains of *H. pylori* on *IL23A* expression. AGS cells were infected with either WT or  $\Delta$ CagA strains of *H. pylori* at MOI 100 for 0h, 6h, 12h and 24h prior to the assessment of *IL23A* transcripts by qRT-PCR. The normalized *IL23A* mRNA levels are expressed relative to the values of uninfected controls. (B) RUNX3 specifically enhanced *H. pylori*-induced *IL23A* but

not *IL8* in gastric epithelial cells. AGS cells transduced with the indicated lentiviruses for 48h were treated with either WT or  $\Delta$ CagA *H. pylori* for 6h prior to the measurement of *IL23A* and *IL8* transcripts by qRT-PCR. Normalized values are expressed relative to those of untreated Lenti-Control samples. (C-D) The degree of RNAi knockdown of RUNX3 and

RUNX1 in HFE-145. (C) HFE-145 cells were transiently transfected with corresponding siRNAs as described for Fig. 3F. Normalized mRNA levels of *RUNX3* and *RUNX1* were

measured by qRT-PCR and expressed as a ratio to the basal values of untreated siCtrl sample (Mock) (means  $\pm$  SEM; n=3). (D) Measurement of RUNX1, RUNX3 and  $\alpha$ -tubulin

expression by Western blotting following RNAi knockdown. (E) RUNX proteins

transactivate *IL23A* promoter in monocytes. Monocytic cell lines K562 and U937 were transfected with wild type or mutant *IL23A*-1200 reporter constructs together with Control, RUNX1 or RUNX3 expression vectors as indicated. Normalized luciferase activities

of each construct are presented relative to the values of corresponding control samples (means  $\pm$  SEM; n=3).

## SUPPLEMENTAL TABLES

**Table S1. Oligonucleotide primers and the positions of targeted regions for ChIP assay.**

| Targeted site  | Amplified regions | Forward Primer              | Reverse Primer          |
|----------------|-------------------|-----------------------------|-------------------------|
| RUNX site A    | -1211 to -1111    | TTCTCAGAAGAAAAGGGTCAACCT    | GGTCCCAGAACAATTTCGAAGA  |
| RUNX site BC   | -235 to -145      | CCCCTTCTATAGCTATTTTCGATTCCT | GGGAAATGAGTAGTGTGGTTGCT |
| RUNX site D    | -139 to -60       | ACTGAGGCTGCATACCTGGG        | AGCAGGTGACTCACAGCAGG    |
| RUNX site BCD  | -190 to -119      | TCCCATCCCAGGCCTCTAG         | CCCAGGTATGCAGCCTCAGT    |
| Non-specific 1 | -708 to -617      | GAGGAGTCAGGTGGTTCTTAGTCAA   | GGTCTTATTGCTCCCCATTTCA  |
| Non-specific 2 | -2040 to -1975    | GTAGTTCCTGCCACGCAACA        | TGCAGGAGTTGGGTAGGAAGA   |
| Non-specific 3 | -3169 to -3073    | ATTGGCCCTCTCACTCACTGTAG     | GGTGGCCAGTGCTGTAGTTA    |

**Table S2. Gene-specific oligonucleotide primers and TaqMan probes used in quantitative RT-PCR.**

| <b>SYBR Green Primers</b> |                          |                            |
|---------------------------|--------------------------|----------------------------|
| Gene                      | Forward                  | Reverse                    |
| <i>IL12A</i>              | GCAGGCCCTGAATTTCAACA     | CATGAAGAAGTATGCAGAGCTTGATT |
| <i>IL27A</i>              | ATCTCACCTGCCAGGAGTGAA    | TGAAGCGTGGTGGAGATGAAG      |
| <i>EBI3</i>               | GGGGAAGTGAAGTACTGGAG     | AGTCGGTCATCTGAGGTTGC       |
| <i>IL8</i>                | TCACTGTGTGTAACATGACTTCCA | TGGCAAACTGCACCTTCC         |
| <i>EpCAM</i>              | GTGATAGCAGTTGTTGCTGG     | TATGCATCTCACCCATCTCC       |
| <i>CD45</i>               | TCCATATATTAGCATTAGTCC    | GAGCATGCAAAATTGAAAACC      |
| <i>IL23A</i>              | AGCCGCCCGGGTCTT          | TCCTTGAGCTGCTGCCTTTAG      |
| <i>IL12B</i>              | GGCTCCATGAAGGTGCTAC      | GTCAGCCTCAGAATGCAAAA       |
| <b>TaqMan Probes</b>      |                          |                            |
| Gene                      | TaqMan ID                |                            |
| <i>GAPDH</i>              | Hs99999905_m1            |                            |
| <i>IL23A</i>              | Hs00900829_g1            |                            |
| <i>IL12B</i>              | Hs99999037_m1            |                            |
| <i>RUNX3</i>              | Hs00231709_m1            |                            |
| <i>RUNX1</i>              | Hs00231079_m1            |                            |



## **SUPPLEMENTAL EXPERIMENTAL PROCEDURE**

### *Cloning of IL23A promoter*

Human IL23A promoter sequence (Genebank accession no NM\_001265) was obtained from UCSC Genome Bioinformatics (<http://www.genome.ucsc.edu/>). The promoter containing the genomic fragment -1200 to +105 of the *IL23A* gene was amplified by PCR from genomic DNA of KATOIII cells and cloned into the pGL3-basic vector (Promega, Madison, USA). Putative RUNX and NF- $\kappa$ B binding sites were identified using the Transcriptional Element Search System program ([www.cbil.upenn.edu/tess/](http://www.cbil.upenn.edu/tess/)) (Heinemeyer et al., 1998). Site-directed mutageneses of identified RUNX and NF- $\kappa$ B binding sites were performed using the QuikChange II kit (Agilent Technologies, Santa Clara, CA), according to manufacturer's instructions.

## **SUPPLEMENTAL REFERENCE**

Heinemeyer, T., E. Wingender, I. Reuter, H. Hermjakob, A. E. Kel, O. V. Kel, E. V. Ignatieva, E. A. Ananko, O. A. Podkolodnaya, F. A. Kolpakov, N. L. Podkolodny, and N. A. Kolchanov. 1998. Databases on transcriptional regulation: TRANSFAC, TRRD and COMPEL. *Nucleic acids research* 26:362-367.
